# Supplementary material for: Suppressing proteasome mediated processing of topoisomerase II DNA-protein complexes preserves genome integrity
Source: eLife. 2020 Feb 14;9:e53447. doi: 10.7554/eLife.53447 (PMC7089766; doi:10.7554/eLife.53447)
Supplement: Supplementary file 1. [file elife-53447-supp1.xlsx]

## Sheet: Sheet1
Figure No.	Replicates number	Replicates type	Experiment Information
Fig 1B	1	N/A	Western Blot
Fig 1C	1	N/A	Immunofluoresence
Fig 1D	3	Biological	ICE Assay
Fig 1E	2	Biological	YFP quantification by FACS
Fig 1F	3 (only 1 example shown)	Biological	Western Blot
Fig 1G	1	N/A	Western Blot
Fig 2A-E	2	Biological	END-seq
Fig 2F	1	N/A	END-seq
Fig 2G-H	1	N/A	END-seq
Fig 2 - Supp Fig 1A-B	2	Biological	END-seq
Fig 3A-D	2	Biological	END-seq
Fig 4B	1	N/A	Metaphase Analysis
Fig 4C-D	1	N/A	SKY Analysis
Fig 4E	3	Biological	EdU Cell Cycle Profiling by FACS
Fig 4F	2 to 5	Biological	Cell Viability measured by Celltiter-Glo
Fig 5A	3	Biological	Metaphase Analysis
Fig 5B	3	Biological	Metaphase Analysis
Fig 5C	1	N/A	Metaphase Analysis
Fig 5D	2	Biological	Metaphase Analysis
Fig 5E	1	N/A	Metaphase Analysis
Fig 5 - Supp Fig 1	2	Biological	Metaphase Analysis
Fig 6A	3	Biological	Western Blot
Fig 6B	1	N/A	END-seq
Fig 6C	3	Biological	Cell Viability measured by Celltiter-Glo
Fig 6D	3	Biological	Colony Survival Assay
Fig 6E	3	Biological	Metaphase Analysis
